# Supplementary material for: High-Intensity Training for Knee Osteoarthritis: A Narrative Review
Source: MDPI journal article supplement (doi:10.3390/sports11040091), 2023-04-20
Supplement: s1 [file s1]

**Table S1.** Table of the excluded studies with reasons for exclusion and references

| #  | Author                                                                                                                                                    | Year | Title                                                                                                                                                                                        | reason for exclusion       |
|----|-----------------------------------------------------------------------------------------------------------------------------------------------------------|------|----------------------------------------------------------------------------------------------------------------------------------------------------------------------------------------------|----------------------------|
| 1  | S. Aciksoz, A. Akyuz and S. Tunay                                                                                                                         | 2017 | The effect of self-administered superficial local hot and cold application methods on pain, functional status and quality of life in primary knee osteoarthritis patients                    | no high intensity training |
| 2  | A. I. Adhama, M. O. Akindele and A. A. Ibrahim                                                                                                            | 2021 | Effects of variable frequencies of kinesthesia, balance and agility exercise program in adults with knee osteoarthritis: study protocol for a randomized controlled trial                    | no high intensity training |
| 3  | M. A. Ahmad, A. H. MS and A. Yusof                                                                                                                        | 2022 | Effects of low-level and high-intensity laser therapy as adjunctive to rehabilitation exercise on pain, stiffness and function in knee osteoarthritis: a systematic review and meta-analysis | no high intensity training |
| 4  | A. Alonazi, S. Hasan, S. Anwer, A. Jamal, S. Parvez, F. A. S. Alfaiz and H. Li                                                                            | 2021 | Efficacy of Electromyographic-Biofeedback Supplementation Training with Patellar Taping on Quadriceps Strengthening in Patellofemoral Pain Syndrome among Young Adult Male Athletes          | no high intensity training |
| 5  | A. Angelova and E. M. Ilieva                                                                                                                              | 2016 | Effectiveness of High Intensity Laser Therapy for Reduction of Pain in Knee Osteoarthritis                                                                                                   | no high intensity training |
| 6  | N. M. Brisson, A. A. Gatti, P. W. Stratford and M. R. Maly                                                                                                | 2018 | Self-efficacy, pain, and quadriceps capacity at baseline predict changes in mobility performance over 2 years in women with knee osteoarthritis                                              | no high intensity training |
| 7  | J. E. Broderick, F. J. Keefe, P. Bruckenthal, D. U. Junghaenel, S. Schneider, J. E. Schwartz, A. T. Kaell, D. S. Caldwell, D. McKee, S. Reed and E. Gould | 2014 | Nurse practitioners can effectively deliver pain coping skills training to osteoarthritis patients with chronic pain: A randomized, controlled trial                                         | no high intensity training |
| 8  | J. Byra and K. Czernicki                                                                                                                                  | 2020 | The effectiveness of virtual reality rehabilitation in patients with knee and hip osteoarthritis                                                                                             | no high intensity training |
| 9  | S. Cakir, S. Hepguler, C. Ozturk, M. Korkmaz, B. Isleten and F. C. Atamaz                                                                                 | 2014 | Efficacy of Therapeutic Ultrasound for the Management of Knee Osteoarthritis                                                                                                                 | no high intensity training |
| 10 | M. B. Corkery, C. P. Hensley, M. K. Danilovich, V. S. Davila and K. K. Chui                                                                               | 2021 | Power Training in Older Adults With Knee Osteoarthritis                                                                                                                                      | no high intensity training |
| 11 | B. L. De Kock, J. Van der Gragt, H. F. Van der Molen, P. Kuijer and N. Zipfel                                                                             | 2023 | What Personal and Work-Related Characteristics of Dutch Construction Workers With Knee Osteoarthritis Are Associated With Future Work Ability?                                               | no high intensity training |
| 12 | N. J. Desale and S. Anandh                                                                                                                                | 2020 | Effectiveness of progressive resistance drills and dynamic balance training on functional performance among the patients with osteoarthritis of knee                                         | no high intensity training |
| 13 | I. Dobrydnjov, C. Anderberg, C. Olsson, O. Shapurova, K. Angel and S. Bergman                                                                             | 2011 | Intraarticular vs. extraarticular ropivacaine infusion following high-dose local infiltration analgesia after total knee arthroplasty: a randomized double-blind study                       | no high intensity training |
| 14 | N. Dogan, H. Yilmaz, B. Ince and S. Akcay                                                                                                                 | 2022 | Is Kinesio Taping Effective for Knee Osteoarthritis? Randomised, Controlled, Double-blind Study                                                                                              | no high intensity training |
| 15 | R. B. Ferraz, B. Gualano, R. Rodrigues, C. O. Kurimori, R. Fuller, F. R. Lima, A. L. De Sá-Pinto and H. Roschel                                           | 2018 | Benefits of Resistance Training with Blood Flow Restriction in Knee Osteoarthritis                                                                                                           | no high intensity training |
| 16 | N. Foroughi, R. M. Smith, A. K. Lange, M. K. Baker, M. A. F. Singh and B. Vanwanseele                                                                     | 2011 | Lower limb muscle strengthening does not change frontal plane moments in women with knee osteoarthritis: A randomized controlled trial                                                       | no high intensity training |
| 17 | S. Heywood, J. McClelland, P. Geigle, A. Rahmann, E. Villalta, B. Mentiplay and R. Clark                                                                  | 2019 | Force during functional exercises on land and in water in older adults with and without knee osteoarthritis: Implications for rehabilitation                                                 | no high intensity training |
| 18 | K. K. Ho, L. C. Lau, W. W. Chau, Q. Poon, K. Y. Chung and R. M. Wong                                                                                      | 2021 | End-stage knee osteoarthritis with and without sarcopenia and the effect of knee arthroplasty - a prospective cohort study                                                                   | no high intensity training |
| 19 | N. Johns, J. Naylor, D. McKenzie, B. Brady and J. Olver                                                                                                   | 2022 | Is inpatient rehabilitation a predictor of a lower incidence of persistent knee pain 3-months following total knee replacement? A retrospective, observational study                         | no high intensity training |
| 20 | Z. Ju, X. Guo, X. Jiang, X. Wang, S. Liu, J. He, H. Cui and K. Wang                                                                                       | 2015 | Electroacupuncture with different current intensities to treat knee osteoarthritis: a single-blinded controlled study                                                                        | no high intensity training |

|    |                                                                                                                                                  |      |                                                                                                                                                                                                                             |                            |
|----|--------------------------------------------------------------------------------------------------------------------------------------------------|------|-----------------------------------------------------------------------------------------------------------------------------------------------------------------------------------------------------------------------------|----------------------------|
| 21 | A. R. Kheshie, M. S. Alayat and M. M. Ali                                                                                                        | 2014 | High-intensity versus low-level laser therapy in the treatment of patients with knee osteoarthritis: a randomized controlled trial                                                                                          | no high intensity training |
| 22 | G. J. Kim, J. Choi, S. Lee, C. Jeon and K. Lee                                                                                                   | 2016 | The effects of high intensity laser therapy on pain and function in patients with knee osteoarthritis                                                                                                                       | no high intensity training |
| 23 | D. Kobsar, S. T. Osis, B. A. Hettinga and R. Ferber                                                                                              | 2015 | Gait biomechanics and patient-reported function as predictors of response to a hip strengthening exercise intervention in patients with knee osteoarthritis                                                                 | no high intensity training |
| 24 | T. Kurien, L. Arendt-Nielsen, K. K. Petersen, T. Graven-Nielsen and B. E. Scammell                                                               | 2018 | Preoperative Neuropathic Pain-like Symptoms and Central Pain Mechanisms in Knee Osteoarthritis Predicts Poor Outcome 6 Months After Total Knee Replacement Surgery                                                          | no high intensity training |
| 25 | A. K. Lange, B. Vanwanseele, N. Foroughi, M. K. Baker, R. Shnier, R. M. Smith and M. A. F. Singh                                                 | 2009 | Resistive Exercise for Arthritic Cartilage Health (REACH): A randomized double-blind, sham-exercise controlled trial                                                                                                        | no high intensity training |
| 26 | C. J. Liu and N. K. Latham                                                                                                                       | 2009 | Progressive resistance strength training for improving physical function in older adults                                                                                                                                    | no high intensity training |
| 27 | M. S. Miller, D. M. Callahan, T. W. Tourville, J. R. Slauterbeck, A. Kaplan, B. R. Fiske, P. D. Savage, P. A. Ades, B. D. Beynnon and M. J. Toth | 2017 | Moderate-intensity resistance exercise alters skeletal muscle molecular and cellular structure and function in inactive older adults with knee osteoarthritis                                                               | no high intensity training |
| 28 | N. Mirmaroori, A. Ghahramanian, M. Behshid, F. Jabbarzadeh, T. C. Onyeka, M. Asghari-Jafarabadi and J. Ganjpour-Sales                            | 2019 | Relationship between self-efficacy and pain control in Iranian women with advanced knee osteoarthritis                                                                                                                      | no high intensity training |
| 29 | M. Mostafa, H. A. Hamada, A. M. Kadry, S. S. Zahran and N. A. Helmy                                                                              | 2022 | Effect of High-Power Laser Therapy Versus Shock Wave Therapy on Pain and Function in Knee Osteoarthritis Patients: A Randomized Controlled Trial                                                                            | no high intensity training |
| 30 | A. Nazari, A. Moezy, P. Nejati and A. Mazaherinezhad                                                                                             | 2019 | Efficacy of high-intensity laser therapy in comparison with conventional physiotherapy and exercise therapy on pain and function of patients with knee osteoarthritis: a randomized controlled trial with 12-week follow up | no high intensity training |
| 31 | B. E. Oiestad, E. Quinn, D. White, F. Roemer, A. Guermazi, M. Nevitt, N. A. Segal, C. E. Lewis and D. T. Felson                                  | 2015 | No Association between Daily Walking and Knee Structural Changes in People at Risk of or with Mild Knee Osteoarthritis. Prospective Data from the Multicenter Osteoarthritis Study                                          | no high intensity training |
| 32 | H. Osteras and F. Paulsberg                                                                                                                      | 2021 | The acute hypoalgesic effect of bicycling on pain for patients with knee osteoarthritis: A cohort study                                                                                                                     | no high intensity training |
| 33 | T. Ozmen, U. Gafuroglu, A. Altun Guvenir, I. Ziraman and B. Ozkurt                                                                               | 2017 | RELATIONSHIP BETWEEN KINESIOPHOBIA, QUADRICEPS MUSCLE STRENGTH AND QUALITY OF LIFE IN PATIENTS WITH KNEE OSTEOARTHRITIS                                                                                                     | no high intensity training |
| 34 | B. D. Perez-Huerta, B. Diaz-Pulido, D. Pecos-Martin, D. Beckwee, E. Lluch-Girbes, R. Fernandez-Matias, M. J. B. Rubio and T. Gallego-Izquierdo   | 2020 | Effectiveness of a Program Combining Strengthening, Stretching, and Aerobic Training Exercises in a Standing versus a Sitting Position in Overweight Subjects with Knee Osteoarthritis: A Randomized Controlled Trial       | no high intensity training |
| 35 | B. A. Rakel, M. B. Zimmerman, K. Geasland, J. Embree, C. R. Clark, N. O. Noiseux, J. J. Callaghan, K. Herr, D. Walsh and K. A. Sluka             | 2014 | Transcutaneous electrical nerve stimulation for the control of pain during rehabilitation after total knee arthroplasty: A randomized, blinded, placebo-controlled trial                                                    | no high intensity training |
| 36 | J. P. Regnaud, M. M. Lefevre-Colau, L. Trinquart, C. Nguyen, I. Boutron, L. Brosseau and P. Ravaud                                               | 2015 | High-intensity versus low-intensity physical activity or exercise in people with hip or knee osteoarthritis                                                                                                                 | no high intensity training |
| 37 | S. Rewald, A. F. T. Lenssen, P. J. Emans, R. A. de Bie, G. van Breukelen and I. Mesters                                                          | 2020 | Aquatic Cycling Improves Knee Pain and Physical Functioning in Patients With Knee Osteoarthritis: A Randomized Controlled Trial                                                                                             | no high intensity training |
| 38 | M. Rubio-Morales, F. A. Miralles-Muñoz, S. Gonzalez-Parreño, M. Ruiz-Lozano, A. Lizaur-Utrilla and M. F. Vizcaya-Moreno                          | 2023 | A relevant number of patients do not increase their engagement in physical, social and leisure activities at the medium-term after total knee arthroplasty: a prospective cohort study                                      | no high intensity training |
| 39 | S. Samaan, M. G. Sedhom and M. O. Grace                                                                                                          | 2022 | A randomized comparative study between high-intensity laser vs low-intensity pulsed ultrasound both combined with exercises for the treatment of knee osteoarthritis                                                        | no high intensity training |
| 40 | P. Siriratna, C. Ratanasutiranont, T. Manissorn, N. Santiniyom and W. Chira-Adisai                                                               | 2022 | Short-Term Efficacy of High-Intensity Laser Therapy in Alleviating Pain in Patients with Knee Osteoarthritis: A Single-Blind Randomised Controlled Trial                                                                    | no high intensity training |

|    |                                                                                                                                                                            |      |                                                                                                                                                                                                                        |                            |
|----|----------------------------------------------------------------------------------------------------------------------------------------------------------------------------|------|------------------------------------------------------------------------------------------------------------------------------------------------------------------------------------------------------------------------|----------------------------|
| 41 | B. Skoffer, T. Maribo, I. Mechlenburg, C. G. Korsgaard, K. Søballe and U. Dalgas                                                                                           | 2020 | Efficacy of preoperative progressive resistance training in patients undergoing total knee arthroplasty: 12-month follow-up data from a randomized controlled trial                                                    | no high intensity training |
| 42 | S. T. Skou, A. Bricca and E. M. Roos                                                                                                                                       | 2018 | The impact of physical activity level on the short- and long-term pain relief from supervised exercise therapy and education: a study of 12,796 Danish patients with knee osteoarthritis                               | no high intensity training |
| 43 | M. B. Stausholm, I. F. Naterstad, P. P. Alfredo, C. Coupe, K. V. Fersum, E. C. P. Leal, R. A. B. Lopes-Martins, J. Joensen and J. M. Bjordal                               | 2022 | Short- and Long-Term Effectiveness of Low-Level Laser Therapy Combined with Strength Training in Knee Osteoarthritis: A Randomized Placebo-Controlled Trial                                                            | no high intensity training |
| 44 | N. Stiglic-Rogoznica, D. Stamenković, L. Frlan-Vrgoc, V. Avancini-Dobrović and T. S. Vrbanić                                                                               | 2011 | Analgesic effect of high intensity laser therapy in knee osteoarthritis                                                                                                                                                | no high intensity training |
| 45 | M. Terradas-Monllor, M. Ochandorena-Acha, H. Beltran-Alacreu, E. G. Oltra, F. C. Saenz and J. H. Hermoso                                                                   |      | A feasibility study of home-based preoperative multimodal physiotherapy for patients scheduled for a total knee arthroplasty who catastrophize about their pain                                                        | no high intensity training |
| 46 | J. Thomazeau, A. Rouquette, V. Martinez, C. Rabuel, N. Prince, J. L. Laplanche, R. Nizard, J. F. Bergmann, S. Perrot and C. Lloret-Linares                                 | 2016 | Predictive Factors of Chronic Post-Surgical Pain at 6 Months Following Knee Replacement: Influence of Postoperative Pain Trajectory and Genetics                                                                       | no high intensity training |
| 47 | C. S. Thudium, A. Engstrøm, A. C. Bay-Jensen, P. Frederiksen, N. Jansen, A. De Zwart, M. van der Leeden, J. Dekker, W. Lems, L. Roorda, W. E. van Spil and M. Van der Esch | 2023 | Cartilage tissue turnover increases with high- compared to low-intensity resistance training in patients with knee OA                                                                                                  | no high intensity training |
| 48 | K. Vader, A. B. Abebe, M. B. Chala, K. Varette and J. Miller                                                                                                               | 2020 | Determining the feasibility of a trial to evaluate the effectiveness of phototherapy versus placebo at reducing pain during physical activity for people with knee osteoarthritis: a pilot randomized controlled trial | no high intensity training |
| 49 | D. K. White, C. Tudor-Locke, D. T. Felson, K. D. Gross, J. B. Niu, M. Nevitt, C. E. Lewis, J. Torner and T. Neogi                                                          | 2013 | Do radiographic disease and pain account for why people with or at high risk of knee osteoarthritis do not meet physical activity guidelines?                                                                          | no high intensity training |
| 50 | B. Woods, A. Manca, H. Weatherly, P. Saramago, E. Sideris, C. Giannopoulou, S. Rice, M. Corbett, A. Vickers, M. Bowes, H. MacPherson and M. Sculpher                       | 2017 | Cost-effectiveness of adjunct non-pharmacological interventions for osteoarthritis of the knee                                                                                                                         | no high intensity training |
| 51 | S. Y. Ababneh, J. W. Prescott and M. N. Gurcan                                                                                                                             | 2011 | Automatic graph-cut based segmentation of bones from knee magnetic resonance images for osteoarthritis research                                                                                                        | no KOA                     |
| 52 | A. Agarwalla, D. R. Christian, J. N. Liu, G. H. Garcia, M. L. Redondo, A. B. Yanke and B. J. Cole                                                                          | 2021 | Return to Work Following Isolated Opening Wedge High Tibial Osteotomy                                                                                                                                                  | no KOA                     |
| 53 | M. S. Akaltun, O. Altindag, N. Turan, S. Gursoy and A. Gur                                                                                                                 | 2021 | Efficacy of high intensity laser therapy in knee osteoarthritis: a double-blind controlled randomized study                                                                                                            | no KOA                     |
| 54 | A. Armstrong, K. J. Rodriguez, A. Sabag, Y. Mavros, H. M. Parker, S. E. Keating and N. A. Johnson                                                                          | 2022 | Effect of aerobic exercise on waist circumference in adults with overweight or obesity: A systematic review and meta-analysis                                                                                          | no KOA                     |
| 55 | N. L. Ashworth, K. E. Chad, E. L. Harrison, B. A. Reeder and S. C. Marshall                                                                                                | 2005 | Home versus center based physical activity programs in older adults                                                                                                                                                    | no KOA                     |
| 56 | J. J. Bjerre-Bastos, C. Sejersen, A. R. Bihlet, N. H. Secher, A. L. Mackey, C. C. Kitchen, P. Drobinski, C. S. Thudium and H. B. Nielsen                                   | 2022 | An Estimate of Plasma Volume Changes Following Moderate-High Intensity Running and Cycling Exercise and Adrenaline Infusion                                                                                            | no KOA                     |
| 57 | M. R. Bougar, H. A. Veiskarami, S. Khodarahimi, A. Izadpanah, M. Sadeghi and N. Nazari                                                                                     | 2022 | Effectiveness of Three Physical Treatments on Pain Perception and Emotional State in Males with Chronic Joint Pain                                                                                                     | no KOA                     |
| 58 | M. Bridges, J. Hilliard and K. V. Chui                                                                                                                                     | 2020 | Effects of Light Therapy on Osteoarthritis and Its Sequelae in Aging and Older Adults A Systematic Narrative Review                                                                                                    | no KOA                     |
| 59 | N. M. Cattano, J. B. Driban, M. F. Barbe, R. T. Tierney, M. Amin and M. R. Sitler                                                                                          | 2017 | Biochemical Response to a Moderate Running Bout in Participants With or Without a History of Acute Knee Injury                                                                                                         | no KOA                     |
| 60 | Q. Chang and C. L. Huang                                                                                                                                                   | 2006 | Effects of moving training on histology and biomarkers levels of articular cartilage                                                                                                                                   | no KOA                     |

|    |                                                                                                                                                                   |      |                                                                                                                                                                                                                          |        |
|----|-------------------------------------------------------------------------------------------------------------------------------------------------------------------|------|--------------------------------------------------------------------------------------------------------------------------------------------------------------------------------------------------------------------------|--------|
| 61 | Q. Chang, C. L. Huang and Z. F. Huang                                                                                                                             | 2007 | Matrix metalloproteinases and inhibitor in knee synovial fluid as cartilage biomarkers in rabbits: The effect of high-intensity jumping exercise                                                                         | no KOA |
| 62 | L. Chen, Y. Ji, X. M. Hu, C. Cui, H. Liu, Y. F. Tang, B. W. Qi, Y. H. Niu, X. Hu, A. X. Yu and Q. L. Fan                                                          | 2018 | Cationic poly-L-lysine-encapsulated melanin nanoparticles as efficient photoacoustic agents targeting to glycosaminoglycans for the early diagnosis of articular cartilage degeneration in osteoarthritis                | no KOA |
| 63 | Q. Chen, H. Luo, C. C. Zhou, H. Yu, S. Yao, F. D. Fu, R. Seeley, X. Ji, Y. P. Yang, P. F. Chen, H. T. Jin, P. J. Tong, D. Chen, C. L. Wu, W. B. Du and H. F. Ruan | 2020 | Comparative intra-articular gene transfer of seven adeno-associated virus serotypes reveals that AAV2 mediates the most efficient transduction to mouse arthritic chondrocytes                                           | no KOA |
| 64 | S. J. Chen, Y. X. Zhu, W. Y. Lao and Y. L. Zhou                                                                                                                   | 2018 | Establishment of a rat model of chronic osteoarthritis by intra-articular injection combined with treadmill exercise                                                                                                     | no KOA |
| 65 | L. Christensen, N. K. Vollestad, M. B. Veierod, B. Stuge, J. Cabri and H. S. Robinson                                                                             | 2019 | The Timed Up & Go test in pregnant women with pelvic girdle pain compared to asymptomatic pregnant and non-pregnant women                                                                                                | no KOA |
| 66 | P. G. Conaghan                                                                                                                                                    | 2002 | Update on osteoarthritis part 1: current concepts and the relation to exercise                                                                                                                                           | no KOA |
| 67 | C. A. Courtney, R. M. Rine, D. T. Jenk, P. D. Collier and A. Waters                                                                                               | 2013 | Enhanced Proprioceptive Acuity at the Knee in the Competitive Athlete                                                                                                                                                    | no KOA |
| 68 | T. J. Crijns, N. Brinkman, S. Ramtin, D. Ring, J. Doornberg, P. Jutte and K. Koenig                                                                               | 2022 | Are There Distinct Statistical Groupings of Mental Health Factors and Pathophysiology Severity Among People with Hip and Knee Osteoarthritis Presenting for Specialty Care?                                              | no KOA |
| 69 | G. L. Cvetanovich, D. R. Christian, G. H. Garcia, J. N. Liu, M. L. Redondo, A. B. Yanke and B. J. Cole                                                            | 2020 | Return to Sport and Patient Satisfaction After Meniscal Allograft Transplantation                                                                                                                                        | no KOA |
| 70 | J. E. Depiazzi, R. A. Forbes, N. Gibson, N. L. Smith, A. C. Wilson, R. N. Boyd and K. Hill                                                                        | 2019 | The effect of aquatic high-intensity interval training on aerobic performance, strength and body composition in a non-athletic population: systematic review and meta-analysis                                           | no KOA |
| 71 | G. D. Deyle, N. E. Henderson, R. L. Matekel, M. G. Ryder, M. B. Garber and S. C. Allison                                                                          | 2000 | Effectiveness of manual physical therapy and exercise in osteoarthritis of the knee. A randomized, controlled trial                                                                                                      | no KOA |
| 72 | V. T. do Amaral, B. Fernandes, A. Y. Ngomane, I. R. Marcal, G. D. Zanini and E. G. Ciolac                                                                         | 2021 | Short-term community-based exercise programs in low-income older women: Does exercise intensity and modality matters?                                                                                                    | no KOA |
| 73 | L. P. dos Santos, R. C. D. Santo, T. R. Ramis, J. K. S. Portes, R. M. D. Chakr and R. M. Xavier                                                                   | 2021 | The effects of resistance training with blood flow restriction on muscle strength, muscle hypertrophy and functionality in patients with osteoarthritis and rheumatoid arthritis: A systematic review with meta-analysis | no KOA |
| 74 | B. Fang, Y. H. Kim and M. Y. Choi                                                                                                                                 | 2022 | Effects of High-Intensity Aquatic or Bicycling Training in Athletes with Unilateral Patellofemoral Pain Syndrome                                                                                                         | no KOA |
| 75 | A. Finney, K. S. Dziedzic, M. Lewis and E. Healey                                                                                                                 | 2017 | Multisite peripheral joint pain: a cross-sectional study of prevalence and impact on general health, quality of life, pain intensity and consultation behaviour                                                          | no KOA |
| 76 | E. Folkesson, A. Turkiewicz, N. Ali, M. Ryden, H. V. Hughes, J. Tjornstrand, P. Onnerfjord and M. Englund                                                         | 2020 | Proteomic comparison of osteoarthritic and reference human menisci using data-independent acquisition mass spectrometry                                                                                                  | no KOA |
| 77 | C. E. S. Franciozi, V. A. F. Tarini, R. D. Reginato, P. R. S. Goncalves, V. P. Medeiros, M. Ferretti, J. L. Dreyfuss, H. B. Nader and F. Faloppa                  | 2013 | Gradual strenuous running regimen predisposes to osteoarthritis due to cartilage cell death and altered levels of glycosaminoglycans                                                                                     | no KOA |
| 78 | Y. Fukumoto, H. Tateuchi, T. Ikezoe, R. Tsukagoshi, H. Akiyama, K. So, Y. Kuroda and N. Ichihashi                                                                 | 2014 | Effects of high-velocity resistance training on muscle function, muscle properties, and physical performance in individuals with hip osteoarthritis: A randomized controlled trial                                       | no KOA |
| 79 | S. A. Garcia, T. J. Moffit, M. N. Vakula, S. C. Holmes, M. M. Montgomery and D. N. Pamukoff                                                                       | 2020 | Quadriceps Muscle Size, Quality, and Strength and Self-Reported Function in Individuals With Anterior Cruciate Ligament Reconstruction                                                                                   | no KOA |
| 80 | W. Geidl, K. Abu-Omar, M. Weege, S. Messing and K. Pfeifer                                                                                                        | 2020 | German recommendations for physical activity and physical activity promotion in adults with noncommunicable diseases                                                                                                     | no KOA |
| 81 | S. Z. George, J. M. Beneciuk, T. A. Lentz, S. S. Wu, Y. Dai, J. E. Bialosky and G. Zeppieri                                                                       | 2018 | Optimal Screening for Prediction of Referral and Outcome (OSPRO) for Musculoskeletal Pain Conditions: Results From the Validation Cohort                                                                                 | no KOA |

|     |                                                                                                                                                                                                                                                                              |      |                                                                                                                                                                                                                                               |        |
|-----|------------------------------------------------------------------------------------------------------------------------------------------------------------------------------------------------------------------------------------------------------------------------------|------|-----------------------------------------------------------------------------------------------------------------------------------------------------------------------------------------------------------------------------------------------|--------|
| 82  | D. J. Green, M. Lewis, G. Mansell, M. Artus, K. S. Dziedzic, E. M. Hay, N. E. Foster and D. A. van der Windt                                                                                                                                                                 | 2018 | Clinical course and prognostic factors across different musculoskeletal pain sites: A secondary analysis of individual patient data from randomised clinical trials                                                                           | no KOA |
| 83  | V. Gremeaux, J. Renault, L. Pardon, G. Deley, R. Lepers and J. M. Casillas                                                                                                                                                                                                   | 2008 | Low-Frequency Electric Muscle Stimulation Combined With Physical Therapy After Total Hip Arthroplasty for Hip Osteoarthritis in Elderly Patients: A Randomized Controlled Trial                                                               | no KOA |
| 84  | Y. Guerrero, N. Soomro, G. Wilson, Y. Dam, J. Meiklejohn, K. Simpson, R. Smith, J. Brand-Miller, M. Simic, H. O'Connor, Y. Mavros, N. Foroughi, T. Poon, K. Bradshaw, L. March, B. Vanwanseele, F. Eckstein, M. Fransen, J. Bergamasco, A. Anandacoomarasamy and M. F. Singh | 2015 | Train High Eat Low for Osteoarthritis study (THE LO study): protocol for a randomized controlled trial                                                                                                                                        | no KOA |
| 85  | M. Guillot, M. Moreau, M. Heit, J. Martel-Pelletier, J. P. Pelletier and E. Troncy                                                                                                                                                                                           | 2013 | m Characterization of osteoarthritis in cats and meloxicam efficacy using objective chronic pain evaluation tools                                                                                                                             | no KOA |
| 86  | L. E. Hart, D. A. Haaland, D. A. Baribeau, I. M. Mukovozov and T. F. Sabljic                                                                                                                                                                                                 | 2008 | The Relationship Between Exercise and Osteoarthritis in the Elderly                                                                                                                                                                           | no KOA |
| 87  | S. Hasan, A. Alonazi, S. Anwer, A. Jamal, S. Parvez, F. A. S. Alfaiz and H. Li                                                                                                                                                                                               | 2022 | Efficacy of Patellar Taping and Electromyographic Biofeedback Training at Various Knee Angles on Quadriceps Strength and Functional Performance in Young Adult Male Athletes with Patellofemoral Pain Syndrome: A Randomized Controlled Trial | no KOA |
| 88  | E. B. Hassan, M. Mirams, A. Ghasem-Zadeh, E. J. Mackie and R. C. Whitton                                                                                                                                                                                                     | 2016 | Role of subchondral bone remodelling in collapse of the articular surface of Thoroughbred racehorses with palmar osteochondral disease                                                                                                        | no KOA |
| 89  | M. A. Holden, P. J. A. Nicolson, M. J. Thomas, N. Corp, R. S. Hinman and K. L. Bennell                                                                                                                                                                                       | 2023 | Osteoarthritis year in review 2022: rehabilitation                                                                                                                                                                                            | no KOA |
| 90  | J. M. Hootman, C. A. Macera, C. G. Helmick and S. N. Blair                                                                                                                                                                                                                   | 2003 | Influence of physical activity-related joint stress on the risk of self-reported hip/knee osteoarthritis: a new method to quantify physical activity                                                                                          | no KOA |
| 91  | L. Hughes, B. Paton, F. Haddad, B. Rosenblatt, C. Gissane and S. D. Patterson                                                                                                                                                                                                | 2018 | Comparison of the acute perceptual and blood pressure response to heavy load and light load blood flow restriction resistance exercise in anterior cruciate ligament reconstruction patients and non-injured populations                      | no KOA |
| 92  | A. H. Jaffri, M. Lynch, S. A. Saliba and J. M. Hart                                                                                                                                                                                                                          | 2021 | Quadriceps Oxygenation During Exercise in Patients With Anterior Cruciate Ligament Reconstruction                                                                                                                                             | no KOA |
| 93  | J. L. Jaremko, R. W. Cheng, R. G. Lambert, A. F. Habib and J. L. Ronsky                                                                                                                                                                                                      | 2006 | Reliability of an efficient MRI-based method for estimation of knee cartilage volume using surface registration                                                                                                                               | no KOA |
| 94  | D. L. Jones                                                                                                                                                                                                                                                                  | 2011 | A public health perspective on physical activity after total hip or knee arthroplasty for osteoarthritis                                                                                                                                      | no KOA |
| 95  | A. B. Jønsson, C. V. Johansen, N. Rolving and M. Pfeiffer-Jensen                                                                                                                                                                                                             | 2021 | Feasibility and estimated efficacy of blood flow restricted training in female patients with rheumatoid arthritis: a randomized controlled pilot study                                                                                        | no KOA |
| 96  | C. O. Kean, T. B. Birmingham, S. J. Garland, D. M. Bryant and J. R. Giffin                                                                                                                                                                                                   | 2011 | Preoperative strength training for patients undergoing high tibial osteotomy: a prospective cohort study with historical controls                                                                                                             | no KOA |
| 97  | Y. A. Kharaz, H. Birch, A. Chester, E. Alchorne, D. Simpson, P. Clegg and E. Comerford                                                                                                                                                                                       | 2021 | The effect of exercise on the protein profile of rat knee joint intra- and extra-articular ligaments                                                                                                                                          | no KOA |
| 98  | K. M. Knutzen, B. A. Pendergrast, B. Lindsey and L. R. Brilla                                                                                                                                                                                                                | 2007 | The effect of high resistance weight training on reported pain in older adults                                                                                                                                                                | no KOA |
| 99  | T. A. Lentz, S. Z. George, O. Manickas-Hill, M. R. Malay, J. O'Donnell, P. Jayakumar, W. Jiranek and R. C. Mather                                                                                                                                                            | 2020 | What General and Pain-associated Psychological Distress Phenotypes Exist Among Patients with Hip and Knee Osteoarthritis?                                                                                                                     | no KOA |
| 100 | S. Q. Li, S. Shaharudin and M. R. A. Kadir                                                                                                                                                                                                                                   | 2021 | Effects of Blood Flow Restriction Training on Muscle Strength and Pain in Patients With Knee Injuries A Meta-Analysis                                                                                                                         | no KOA |
| 101 | X. Li, W. Pan, H. Qin, L. Qu, H. Zhang and X. Zhu                                                                                                                                                                                                                            | 2019 | Blood flow restriction training: A new method for accelerating musculoskeletal rehabilitation                                                                                                                                                 | no KOA |

|     |                                                                                                                                                                                     |      |                                                                                                                                                                                                                                                  |        |
|-----|-------------------------------------------------------------------------------------------------------------------------------------------------------------------------------------|------|--------------------------------------------------------------------------------------------------------------------------------------------------------------------------------------------------------------------------------------------------|--------|
| 102 | C. D. Liao, Y. T. Wu, J. Y. Tsao, P. R. Chen, Y. K. Tu, H. C. Chen and T. H. Liou                                                                                                   | 2020 | Effects of protein supplementation combined with exercise training on muscle mass and function in older adults with lower-extremity osteoarthritis: A systematic review and meta-analysis of randomized trials                                   | no KOA |
| 103 | A. R. Lieve, B. Mack, V. I. Bazaliiskii and A. W. Weber                                                                                                                             | 2016 | Revisiting osteoarthritis in the Cis-Baikal: Understanding behavioral variability and adaptation among middle Holocene foragers                                                                                                                  | no KOA |
| 104 | L. Liu, H. Liu, Z. Zhen, Y. Zheng, X. Zhou, E. Raithe, J. Du, Y. Hu, W. Chen and X. Hu                                                                                              | 2022 | Analysis of Knee Joint Injury Caused by Physical Training of Freshmen Students Based on 3T MRI and Automatic Cartilage Segmentation Technology: A Prospective Study                                                                              | no KOA |
| 105 | L. P. Liu, N. Chang, S. H. Li, P. P. Gong and J. H. Wang                                                                                                                            | 2022 | Optical Microscope Rehabilitation Nursing Study of Anterior Cruciate Ligament Injury through Lateral Knee Incision Based on Medical Internet of Things                                                                                           | no KOA |
| 106 | H. S. Longpre, J. R. Potvin and M. R. Maly                                                                                                                                          | 2013 | Biomechanical changes at the knee after lower limb fatigue in healthy young women                                                                                                                                                                | no KOA |
| 107 | J. F. Lopez, R. V. Espinoza, F. Alvear-Vasquez, L. S. Macedo, D. M. Velasquez, W. R. Pocco, M. C. Bolaños and R. G. Campos                                                          | 2021 | Systematic review of aquatic physical exercise programs on functional fitness in older adults                                                                                                                                                    | no KOA |
| 108 | S. Lucarno, M. Zago, M. Buckthorpe, A. Grassi, F. Tosarelli, R. Smith and F. Della Villa                                                                                            | 2021 | Systematic Video Analysis of Anterior Cruciate Ligament Injuries in Professional Female Soccer Players                                                                                                                                           | no KOA |
| 109 | V. A. Lukas, K. W. Fishbein, P. C. Lin, M. Schar, E. Schneider, C. P. Neu, R. G. Spencer and D. A. Reiter                                                                           | 2015 | Classification of Histologically Scored Human Knee Osteochondral Plugs by Quantitative Analysis of Magnetic Resonance Images at 3T                                                                                                               | no KOA |
| 110 | N. Magni, P. McNair and D. Rice                                                                                                                                                     | 2022 | Six weeks of resistance training (plus advice) vs advice only in hand osteoarthritis: A single-blind, randomised, controlled feasibility trial                                                                                                   | no KOA |
| 111 | C. D. Mallen, B. I. Nicholl, M. Lewis, B. Bartlam, D. Green, S. Jowett, J. Kigozi, J. Belcher, K. Clarkson, Z. Lingard, C. Pope, C. A. Chew-Graham, P. Croft, E. M. Hay and G. Peat | 2017 | The effects of implementing a point-of-care electronic template to prompt routine anxiety and depression screening in patients consulting for osteoarthritis (the Primary Care Osteoarthritis Trial): A cluster randomised trial in primary care | no KOA |
| 112 | T. Manyanga, M. Froese, R. Zarychanski, A. Abou-Setta, C. Friesen, M. Tennenhouse and B. L. Shay                                                                                    | 2014 | Pain management with acupuncture in osteoarthritis: a systematic review and meta-analysis                                                                                                                                                        | no KOA |
| 113 | K. A. Martin and A. R. Sinden                                                                                                                                                       | 2001 | Who will stay and who will go? A review of older adults' adherence to randomized controlled trials of exercise                                                                                                                                   | no KOA |
| 114 | J. S. Mason, M. S. Crowell, R. A. Brindle, J. A. Dolbeer, E. M. Miller, T. A. Telemeco and D. L. Goss                                                                               | 2022 | The Effect of Blood Flow Restriction Training on Muscle Atrophy Following Meniscal Repair or Chondral Restoration Surgery in Active Duty Military: A Randomized Controlled Trial                                                                 | no KOA |
| 115 | J. L. Mateer, J. M. Hoch, C. G. Mattacola, T. A. Butterfield and C. Lattermann                                                                                                      | 2015 | Serum Cartilage Oligomeric Matrix Protein Levels in Collegiate Soccer Athletes over the Duration of an Athletic Season: A Pilot Study                                                                                                            | no KOA |
| 116 | F. Mayer, H. Schmitt and H. H. Dickhuth                                                                                                                                             | 2003 | The relevance of sports for the onset, prevention and rehabilitation of osteoarthritis                                                                                                                                                           | no KOA |
| 117 | J. A. Mettler, D. M. Magee and B. M. Doucet                                                                                                                                         | 2018 | High-Frequency Neuromuscular Electrical Stimulation Increases Anabolic Signaling                                                                                                                                                                 | no KOA |
| 118 | G. Milandri and S. Sivarasu                                                                                                                                                         | 2021 | A Randomized Controlled Trial of Eccentric Versus Concentric Cycling for Anterior Cruciate Ligament Reconstruction Rehabilitation                                                                                                                | no KOA |
| 119 | J. J. Mitchell, J. Chahla and R. F. LaPrade                                                                                                                                         | 2016 | Editorial Commentary: Limited Data Shows How Little We Know                                                                                                                                                                                      | no KOA |
| 120 | H. Moffet, L. Noreau, E. Parent and M. Drolet                                                                                                                                       | 2000 | Feasibility of an eight-week dance-based exercise program and its effects on locomotor ability of persons with functional class III rheumatoid arthritis                                                                                         | no KOA |
| 121 | M. Moreau, B. Lussier, J. P. Pelletier, J. Martel-Pelletier, C. Bedard, D. Gauvin and E. Troncy                                                                                     | 2012 | Brachystryma calycinum D. Don Effectively Reduces the Locomotor Disability in Dogs with Naturally Occurring Osteoarthritis: A Randomized Placebo-Controlled Trial                                                                                | no KOA |
| 122 | P. J. Mork, A. Holtermann and T. I. Nilsen                                                                                                                                          | 2012 | Effect of body mass index and physical exercise on risk of knee and hip osteoarthritis: longitudinal data from the Norwegian HUNT Study                                                                                                          | no KOA |
| 123 | S. L. Murphy, D. M. Strasburg, A. K. Lyden, D. M. Smith, J. F. Koliba, D. P. Dadabhoy and S. M. Wallis                                                                              | 2008 | Effects of Activity Strategy Training on Pain and Physical Activity in Older Adults With Knee or Hip Osteoarthritis: A Pilot Study                                                                                                               | no KOA |

|     |                                                                                                                                                                                                                    |      |                                                                                                                                                                                                                                                           |        |
|-----|--------------------------------------------------------------------------------------------------------------------------------------------------------------------------------------------------------------------|------|-----------------------------------------------------------------------------------------------------------------------------------------------------------------------------------------------------------------------------------------------------------|--------|
| 124 | R. C. Murray, H. L. Birch, K. Lakhani and A. E. Goodship                                                                                                                                                           | 2001 | Biochemical composition of equine carpal articular cartilage is influenced by short-term exercise in a site-specific manner                                                                                                                               | no KOA |
| 125 | R. C. Murray, C. F. Zhu, A. E. Goodship, K. H. Lakhani, C. M. Agrawal and K. A. Athanasiou                                                                                                                         | 1999 | Exercise affects the mechanical properties and histological appearance of equine articular cartilage                                                                                                                                                      | no KOA |
| 126 | W. N. Newberry, J. J. Garcia, C. D. Mackenzie, C. E. Decamp and R. C. Haut                                                                                                                                         | 1998 | Analysis of acute mechanical insult in an animal model of post-traumatic osteoarthritis                                                                                                                                                                   | no KOA |
| 127 | G. X. Ni, L. Q. Zhan, M. Q. Gao, L. Lei, Y. Z. Zhou and Y. X. Pan                                                                                                                                                  | 2011 | Matrix metalloproteinase-3 inhibitor retards treadmill running-induced cartilage degradation in rats                                                                                                                                                      | no KOA |
| 128 | B. J. Nicklas, W. Ambrosius, S. P. Messier, G. D. Miller, B. Penninx, R. F. Loeser, S. Palla, E. Bleeker and M. Pahor                                                                                              | 2004 | Diet-induced weight loss, exercise, and chronic inflammation in older, obese adults: a randomized controlled clinical trial                                                                                                                               | no KOA |
| 129 | J. Nyland, A. Huffstutler, J. Faridi, S. Sachdeva, M. Nyland and D. Caborn                                                                                                                                         | 2020 | Cruciate ligament healing and injury prevention in the age of regenerative medicine and technostress: homeostasis revisited                                                                                                                               | no KOA |
| 130 | M. C. O'Dell, D. Jaramillo, L. Bancroft, L. Varich, G. Logsdon and S. Servaes                                                                                                                                      | 2016 | Imaging of Sports-related Injuries of the Lower Extremity in Pediatric Patients                                                                                                                                                                           | no KOA |
| 131 | H. S. Park, J. S. Song and E. K. Kim                                                                                                                                                                               | 2022 | Effects of low-intensity resistance exercise with blood flow restriction after high tibial osteotomy in middle-aged women                                                                                                                                 | no KOA |
| 132 | J. C. Patzkowski, J. G. Owens, R. V. Blanck, K. L. Kirk and J. R. Hsu                                                                                                                                              | 2012 | Deployment after limb salvage for high-energy lower-extremity trauma                                                                                                                                                                                      | no KOA |
| 133 | C. Qi and H. Changlin                                                                                                                                                                                              | 2007 | Levels of biomarkers correlate with magnetic resonance imaging progression of knee cartilage degeneration: a study on canine                                                                                                                              | no KOA |
| 134 | C. Qi and H. Changlin                                                                                                                                                                                              | 2008 | EFFECTS OF DIFFERENT MODE HIGH-INTENSITY MOVEMENT TRAINING ON ARTICULAR CARTILAGE IN HISTOLOGY - A RANDOMIZED CONTROLLED TRIAL ON RABBIT KNEE                                                                                                             | no KOA |
| 135 | S. Raman, G. E. Gold, M. S. Rosen and B. Sveinsson                                                                                                                                                                 | 2022 | Automatic estimation of knee effusion from limited MRI data                                                                                                                                                                                               | no KOA |
| 136 | W. J. Rejeski, R. Axtell, R. Fielding, J. Katula, A. C. King, T. M. Manini, A. P. Marsh, M. Pahor, A. Rego, C. Tudor-Locke, M. Newman, M. P. Walkup, M. E. Miller and L. S. I. Grp                                 | 2013 | Promoting physical activity for elders with compromised function: the Lifestyle Interventions and Independence for Elders (LIFE) Study physical activity intervention                                                                                     | no KOA |
| 137 | J. L. Rios, K. R. Boldt, J. W. Mather, R. A. Seerattan, D. A. Hart and W. Herzog                                                                                                                                   | 2018 | Quantifying the Effects of Different Treadmill Training Speeds and Durations on the Health of Rat Knee Joints                                                                                                                                             | no KOA |
| 138 | R. Rodrigues, R. B. Ferraz, C. O. Kurimori, L. K. Guedes, F. R. Lima, A. L. de Sa-Pinto, B. Gualano and H. Roschel                                                                                                 | 2020 | Low-Load Resistance Training With Blood-Flow Restriction in Relation to Muscle Function, Mass, and Functionality in Women With Rheumatoid Arthritis                                                                                                       | no KOA |
| 139 | F. W. Roemer, A. Guermazi, Y. Q. Zhang, M. Yang, D. J. Hunter, M. D. Crema and K. Bojndorf                                                                                                                         | 2009 | Hoffa's Fat Pad: Evaluation on Unenhanced MR Images as a Measure of Patellofemoral Synovitis in Osteoarthritis                                                                                                                                            | no KOA |
| 140 | S. Rolff, C. Korallus and A. A. Hanke                                                                                                                                                                              | 2020 | Rehabilitation with the aid of blood flow restriction training                                                                                                                                                                                            | no KOA |
| 141 | A. Sarmanova, M. Doherty, C. Kuo, J. Wei, A. Abhishek, C. Mallen, C. Zeng, Y. Wang, G. Lei and W. Zhang                                                                                                            | 2020 | Statin use and risk of joint replacement due to osteoarthritis and rheumatoid arthritis: a propensity-score matched longitudinal cohort study                                                                                                             | no KOA |
| 142 | R. Schachar and D. Ogilvie-Harris                                                                                                                                                                                  | 2015 | Osteoarthritis: Joint conservation strategies                                                                                                                                                                                                             | no KOA |
| 143 | J. M. Schulz, T. B. Birmingham, H. F. Atkinson, E. Woehrle, C. A. Primeau, M. J. Lukacs, B. K. Al-Khazraji, M. C. M. Khan, B. O. Zomar, R. J. Petrella, F. Beier, C. T. Appleton, J. K. Shoemaker and D. M. Bryant | 2020 | Are we missing the target? Are we aiming too low? What are the aerobic exercise prescriptions and their effects on markers of cardiovascular health and systemic inflammation in patients with knee osteoarthritis? A systematic review and meta-analysis | no KOA |

|     |                                                                                                                                                                          |      |                                                                                                                                                                                                                              |               |
|-----|--------------------------------------------------------------------------------------------------------------------------------------------------------------------------|------|------------------------------------------------------------------------------------------------------------------------------------------------------------------------------------------------------------------------------|---------------|
| 144 | A. I. Semciw, T. Pizzari, S. Woodley, A. Zacharias, M. Kingsley and R. A. Green                                                                                          | 2018 | Targeted gluteal exercise versus sham exercise on self-reported physical function for people with hip osteoarthritis (the GH0st trial - Gluteal exercise for Hip Osteoarthritis): a protocol for a randomised clinical trial | no KOA        |
| 145 | M. Sengupta, Y. Q. Zhang, J. B. Niu, A. Guermazi, M. Grigorian, D. Gale, D. T. Felson and D. J. Hunter                                                                   | 2006 | High signal in knee osteophytes is not associated with knee pain                                                                                                                                                             | no KOA        |
| 146 | J. D. Sessford, L. R. Brawley and N. C. Gyurcsik                                                                                                                         | 2015 | Examination of Self-Regulatory Efficacy and Pain Among Individuals Challenged by Arthritis Flares                                                                                                                            | no KOA        |
| 147 | D. Shin                                                                                                                                                                  | 2014 | Association Between Metabolic Syndrome, Radiographic Knee Osteoarthritis, and Intensity of Knee Pain: Results of a National Survey                                                                                           | no KOA        |
| 148 | A. C. Skelly, R. Chou, J. R. Dettori, J. A. Turner, J. L. Friedly, S. D. Rundell, R. Fu, E. D. Brodt, N. Wasson, C. Winter and A. J. R. Ferguson                         | 2018 | AHRQ Comparative Effectiveness Reviews                                                                                                                                                                                       | no KOA        |
| 149 | M. Sobejana, J. van den Hoek, G. S. Metsios, G. D. Kitas, M. van der Leeden, S. Verberne, H. T. Jorstad, M. Pijnappels, W. F. Lems, M. T. Nurmohamed and M. van der Esch | 2022 | Exercise intervention on cardiorespiratory fitness in rheumatoid arthritis patients with high cardiovascular disease risk: a single-arm pilot study                                                                          | no KOA        |
| 150 | J. D. Sprick and C. A. Rickards                                                                                                                                          | 2017 | Cyclical blood flow restriction resistance exercise: a potential parallel to remote ischemic preconditioning?                                                                                                                | no KOA        |
| 151 | B. Tanriverdi, G. Tanriverdi, E. Ercin, F. K. Dagistanli, H. N. Ones, E. Edipoglu, S. D. Delipinar, B. Isildar and M. G. Bilgili                                         | 2021 | THE FAT PAT TISSUE EXPRESSES A PATHOGENIC PROFILE OF INFLAMMATORY MEDIATORIES AND 4-HNE IN PATIENTS WITH OSTEOARTHRITIS                                                                                                      | no KOA        |
| 152 | J. L. W. Taylor, C. M. Campbell, R. J. Thorpe, K. E. Whitfield, M. Nkimbeng and S. L. Szanton                                                                            | 2018 | Pain, Racial Discrimination, and Depressive Symptoms among African American Women                                                                                                                                            | no KOA        |
| 153 | C. C. Tomás, E. Oliveira, D. Sousa et al.                                                                                                                                | 2016 | Proceedings of the 3rd IPLeiria's International Health Congress : Leiria, Portugal. 6-7 May 2016                                                                                                                             | no KOA        |
| 154 | K. Townsend, I. Imbert, V. Eaton, G. W. Stevenson and T. King                                                                                                            | 2022 | Voluntary exercise blocks ongoing pain and diminishes bone remodeling while sparing protective mechanical pain in a rat model of advanced osteoarthritis pain                                                                | no KOA        |
| 155 | M. Van der Esch, M. Heijmans and J. Dekker                                                                                                                               | 2003 | Factors contributing to possession and use of walking aids among persons with rheumatoid arthritis and osteoarthritis                                                                                                        | no KOA        |
| 156 | H. K. Vincent and K. R. Vincent                                                                                                                                          | 2013 | Considerations for Initiating and Progressing Running Programs in Obese Individuals                                                                                                                                          | no KOA        |
| 157 | V. Wylde, V. Wells, S. Dixon and R. Gooberman-Hill                                                                                                                       | 2014 | The colour of pain: can patients use colour to describe osteoarthritis pain?                                                                                                                                                 | no KOA        |
| 158 | T. Yasuda                                                                                                                                                                | 2022 | Selected Methods of Resistance Training for Prevention and Treatment of Sarcopenia                                                                                                                                           | no KOA        |
| 159 | X. C. Yuan, B. Zhu, X. H. Jing, L. Z. Xiong, C. H. Wu, F. Gao, H. P. Li, H. C. Xiang, H. Zhu, B. Zhou, W. He, C. Y. Lin, H. L. Pan, Q. Wang and M. Li                    | 2018 | Electroacupuncture Potentiates Cannabinoid Receptor-Mediated Descending Inhibitory Control in a Mouse Model of Knee Osteoarthritis                                                                                           | no KOA        |
| 160 | L. A. Zdziarski, J. G. Wasser and H. K. Vincent                                                                                                                          | 2015 | Chronic pain management in the obese patient: a focused review of key challenges and potential exercise solutions                                                                                                            | no KOA        |
| 161 | N. Zeng, T. Liao, X. Y. Chen, Z. P. Yan, J. T. Li and G. X. Ni                                                                                                           | 2021 | Treadmill running induces remodeling of the infrapatellar fat pad in an intensity-dependent manner                                                                                                                           | no KOA        |
| 162 | R. Zhang                                                                                                                                                                 | 2022 | Application of Biomaterials in Tendon Injury Healing and Adhesion in Sports                                                                                                                                                  | no KOA        |
| 163 | X. Zhou, H. Cao, M. Wang, J. Zou and W. Wu                                                                                                                               | 2021 | Moderate-intensity treadmill running relieves motion-induced post-traumatic osteoarthritis mice by up-regulating the expression of lncRNA H19                                                                                | no KOA        |
| 164 | O. Abrahin, R. P. Rodrigues, E. C. Sousa, J. D. Beas-Jiménez, A. C. Marçal and M. E. Da Silva-Grigoletto                                                                 | 2015 | Effect of 24 sessions of resistance training in a patient with gonarthrosis bilateral: A case study                                                                                                                          | no cohort/RCT |
| 165 | A. Agarwalla, J. N. Liu, H. H. Wu, I. L. Kalbian, G. H. Garcia and B. E. Shubin Stein                                                                                    | 2021 | Return to Work Following Tibial Tubercle Osteotomy for Patellofemoral Osteoarthritis and Pain                                                                                                                                | no cohort/RCT |



|     |                                                                                                                                                                                                                                                                                                                                                                                            |      |                                                                                                                                                                                         |               |
|-----|--------------------------------------------------------------------------------------------------------------------------------------------------------------------------------------------------------------------------------------------------------------------------------------------------------------------------------------------------------------------------------------------|------|-----------------------------------------------------------------------------------------------------------------------------------------------------------------------------------------|---------------|
| 166 | S. R. Akinbo, O. Sokunbi and T. Ogunbameru                                                                                                                                                                                                                                                                                                                                                 | 2008 | Factors contributing to possession of walking aids among persons with osteoarthritis of the knee                                                                                        | no cohort/RCT |
| 167 | M. S. M. Alayat, T. H. A. Aly, A. E. M. Elsayed and A. S. M. Fadil                                                                                                                                                                                                                                                                                                                         | 2017 | Efficacy of pulsed Nd:YAG laser in the treatment of patients with knee osteoarthritis: a randomized controlled trial                                                                    | no cohort/RCT |
| 168 | E. Alentorn-Geli, K. Samuelsson, V. Musahl, C. L. Green, M. Bhandari and J. Karlsson                                                                                                                                                                                                                                                                                                       | 2017 | The Association of Recreational and Competitive Running With Hip and Knee Osteoarthritis: A Systematic Review and Meta-analysis                                                         | no cohort/RCT |
| 169 | M. J. Bade and J. E. Stevens-Lapsley                                                                                                                                                                                                                                                                                                                                                       | 2012 | Restoration of physical function in patients following total knee arthroplasty: an update on rehabilitation practices                                                                   | no cohort/RCT |
| 170 | S. M. Bierma-Zeinstra and B. W. Koes                                                                                                                                                                                                                                                                                                                                                       | 2007 | Risk factors and prognostic factors of hip and knee osteoarthritis                                                                                                                      | no cohort/RCT |
| 171 | H. Bonakdari, G. Tardif, F. Abram, J. P. Pelletier and J. Martel-Pelletier                                                                                                                                                                                                                                                                                                                 | 2020 | Serum adipokines/related inflammatory factors and ratios as predictors of infrapatellar fat pad volume in osteoarthritis: Applying comprehensive machine learning approaches            | no cohort/RCT |
| 172 | L. Brosseau, L. MacLeay, V. Robinson, G. Wells and P. Tugwell                                                                                                                                                                                                                                                                                                                              | 2003 | Intensity of exercise for the treatment of osteoarthritis                                                                                                                               | no cohort/RCT |
| 173 | L. Brosseau, J. Taki, B. Desjardins, O. Thevenot, M. Fransen, G. A. Wells, A. M. Imoto, K. Toupin-April, M. Westby, I. C. A. Gallardo, W. Gifford, L. Laferriere, P. Rahman, L. Loew, G. De Angelis, S. Cavallo, S. M. Shallwani, A. Aburub, K. L. Bennell, M. Van der Esch, M. Simic, S. McConnell, A. Harmer, G. P. Kenny, G. Paterson, J. P. Regnaud, M. M. Lefevre-Colau and L. McLean | 2017 | The Ottawa panel clinical practice guidelines for the management of knee osteoarthritis. Part three: aerobic exercise programs                                                          | no cohort/RCT |
| 174 | M. S. Cerqueira and W. H. D. Vieira                                                                                                                                                                                                                                                                                                                                                        | 2019 | Effects of blood flow restriction exercise with very low load and low volume in patients with knee osteoarthritis: protocol for a randomized trial                                      | no cohort/RCT |
| 175 | A. C. De Almeida, M. G. Pedroso, J. B. Aily, G. H. Gonçalves, C. M. Pastre and S. M. Mattiello                                                                                                                                                                                                                                                                                             | 2018 | Influence of a periodized circuit training protocol on intermuscular adipose tissue of patients with knee osteoarthritis: Protocol for a randomized controlled trial                    | no cohort/RCT |
| 176 | H. A. de Ruiter, B. van Gorp and J. F. A. Eijkenboom                                                                                                                                                                                                                                                                                                                                       | 2017 | Comments on "Effects of high intensity resistance aquatic training on body composition and walking speed in women with mild knee osteoarthritis: a 4-month RCT with 12-month follow-up" | no cohort/RCT |
| 177 | L. di Biase, E. Falato, M. L. Caminiti, P. M. Pecoraro, F. Narducci and V. Di Lazzaro                                                                                                                                                                                                                                                                                                      | 2021 | Focused Ultrasound (FUS) for Chronic Pain Management: Approved and Potential Applications                                                                                               | no cohort/RCT |
| 178 | W. H. Ettinger and R. F. Afbale                                                                                                                                                                                                                                                                                                                                                            | 1994 | PHYSICAL-DISABILITY FROM KNEE OSTEOARTHRITIS - THE ROLE OF EXERCISE AS AN INTERVENTION                                                                                                  | no cohort/RCT |
| 179 | S. A. M. Fenton, T. Neogi, D. Dunlop, M. Nevitt, M. Doherty, J. L. Duda, R. Klocke, A. Abhishek, A. Rushton, W. Zhang, C. E. Lewis, J. Torner, G. Kitas, D. K. White and G. Multictr Osteoarthritis                                                                                                                                                                                        | 2018 | Does the intensity of daily walking matter for protecting against the development of a slow gait speed in people with or at high risk of knee osteoarthritis? An observational study    | no cohort/RCT |
| 180 | M. Fransen, S. McConnell, G. Hernandez-Molina and S. Reichenbach                                                                                                                                                                                                                                                                                                                           | 2014 | Exercise for osteoarthritis of the hip                                                                                                                                                  | no cohort/RCT |
| 181 | W. F. Gomes, A. C. R. Lacerda, G. E. A. Brito-Melo, S. F. Fonseca, E. Rocha-Vieira, A. A. O. Leopoldino, M. R. Amorim and V. A. Mendonca                                                                                                                                                                                                                                                   | 2016 | Aerobic training modulates T cell activation in elderly women with knee osteoarthritis                                                                                                  | no cohort/RCT |
| 182 | X. H. Guo, P. Zhao, X. Zhou, J. L. Wang and R. R. Wang                                                                                                                                                                                                                                                                                                                                     | 2022 | A recommended exercise program appropriate for patients with knee osteoarthritis: A systematic review and meta-analysis                                                                 | no cohort/RCT |
| 183 | J. Hua, L. Sun and Y. Teng                                                                                                                                                                                                                                                                                                                                                                 | 2023 | Effects of High-Intensity Strength Training in Adults with Knee Osteoarthritis: A Systematic Review and Meta-analysis of Randomized Controlled Trials                                   | no cohort/RCT |
| 184 | D. J. Hunter, Y. Q. Zhang, J. B. Niu, J. Goggins, S. Amin, M. P. LaValley, A. Guermazi, H. Genant, D. Gale and D. T. Felson                                                                                                                                                                                                                                                                | 2006 | Increase in bone marrow lesions associated with cartilage loss - A longitudinal magnetic resonance imaging study of knee osteoarthritis                                                 | no cohort/RCT |

|     |                                                                                                                                                                          |      |                                                                                                                                                                                                         |               |
|-----|--------------------------------------------------------------------------------------------------------------------------------------------------------------------------|------|---------------------------------------------------------------------------------------------------------------------------------------------------------------------------------------------------------|---------------|
| 185 | P. N. Huu, D. N. Thanh, T. L. T. Hai, H. C. Duc, H. P. Viet and C. N. Trong                                                                                              | 2022 | Detection and Classification Knee Osteoarthritis Algorithm using YOLOv3 and VGG-16 Models                                                                                                               | no cohort/RCT |
| 186 | R. A. C. Jardim, T. S. de Sousa, W. N. N. Dos Santos, A. P. Matos and N. C. R. Iosimuta                                                                                  | 2022 | Blood flow restriction with different load levels in patients with knee osteoarthritis: protocol of a randomized controlled trial                                                                       | no cohort/RCT |
| 187 | J. W. L. Keogh, J. Grigg and C. J. Vertullo                                                                                                                              | 2017 | Is Home-Based, High-Intensity Interval Training Cycling Feasible and Safe for Patients With Knee Osteoarthritis?: Study Protocol for a Randomized Pilot Study                                           | no cohort/RCT |
| 188 | M. M. Y. Kwok, S. S. M. Ng, S. S. Man and B. C. L. So                                                                                                                    | 2022 | The effect of aquatic High Intensity Interval Training on cardiometabolic and physical health markers in women: A systematic review and meta-analysis                                                   | no cohort/RCT |
| 189 | B. N. Leitzelar and K. F. Koltyn                                                                                                                                         | 2021 | Exercise and Neuropathic Pain: A General Overview of Preclinical and Clinical Research                                                                                                                  | no cohort/RCT |
| 190 | M. Lewek, J. Stevens and L. Snyder-Mackler                                                                                                                               | 2001 | The use of electrical stimulation to increase quadriceps femoris muscle force in an elderly patient following a total knee arthroplasty                                                                 | no cohort/RCT |
| 191 | R. Li, B. Hu, Z. Liu, S. Xu, J. Li, S. Ma, Z. Wang and J. Liu                                                                                                            | 2021 | Insight Into the Effect of Hospital-Based Prehabilitation on Postoperative Outcomes in Patients With Total Knee Arthroplasty: A Retrospective Comparative Study                                         | no cohort/RCT |
| 192 | X. D. Li, G. F. Sun, W. B. Zhu and Y. H. Wang                                                                                                                            | 2015 | Effects of high intensity exhaustive exercise on SOD, MDA, and NO levels in rats with knee osteoarthritis                                                                                               | no cohort/RCT |
| 193 | Y. Liu, Y. Wang, Y. Wang and X. Jia                                                                                                                                      | 2022 | A Meta-Analysis of Analgesic Effect of Ultrasound Therapy for Patients With Knee Osteoarthritis                                                                                                         | no cohort/RCT |
| 194 | A. Malorgio, M. Malorgio, M. Benedetti, S. Casarosa and R. Cannataro                                                                                                     | 2021 | High intensity resistance training as intervention method to knee osteoarthritis                                                                                                                        | no cohort/RCT |
| 195 | I. Mechlenburg, B. Skoffler and U. Dalgas                                                                                                                                | 2018 | Comparison of Early High-Intensity and Low-Intensity Rehabilitation After Total Knee Arthroplasty: Comment on the Article by Bade et al                                                                 | no cohort/RCT |
| 196 | S. P. Messier                                                                                                                                                            | 2021 | High-Intensity Strength Training, Knee Pain, and Knee Joint Compressive Forces in Adults With Knee Osteoarthritis-Reply                                                                                 | no cohort/RCT |
| 197 | S. P. Messier, S. L. Mihalko, D. P. Beavers, B. J. Nicklas, P. DeVita, J. J. Carr, D. J. Hunter, J. D. Williamson, K. L. Bennell, A. Guermazi, M. Lyles and R. F. Loeser | 2013 | Strength Training for Arthritis Trial (START): design and rationale                                                                                                                                     | no cohort/RCT |
| 198 | F. A. Pinheiro, F. O. Pires, B. R. Rønnestad, F. Hardt, M. S. Conceição, M. E. Lixandrão, R. Berton and V. Tricoli                                                       | 2022 | The Effect of Low-intensity Aerobic Training Combined with Blood Flow Restriction on Maximal Strength, Muscle Mass, and Cycling Performance in a Cyclist with Knee Displacement                         | no cohort/RCT |
| 199 | A. Pitsillides, D. Stasinopoulos and I. Mamais                                                                                                                           | 2021 | Blood flow restriction training in patients with knee osteoarthritis: Systematic review of randomized controlled trials                                                                                 | no cohort/RCT |
| 200 | R. Restuccia, D. Ruggieri, L. Magaudo and R. Talotta                                                                                                                     | 2022 | The preventive and therapeutic role of physical activity in knee osteoarthritis                                                                                                                         | no cohort/RCT |
| 201 | S. R. Robbins, L. R. S. Melo, H. Urban, L. A. Devezza, R. Asher, V. L. Johnson and D. J. Hunter                                                                          | 2017 | Stepped care approach for medial tibiofemoral osteoarthritis (STrEAMline): Protocol for a randomised controlled trial                                                                                   | no cohort/RCT |
| 202 | L. L. Shen, G. F. Huang, W. Tian, L. L. Yu, X. C. Yuan, Z. Q. Zhang, J. Yin, C. Y. Ma, G. W. Cai, J. W. Li, M. Q. Ding, W. He, X. Y. Gao, B. Zhu, X. H. Jing and M. Li   | 2015 | Electroacupuncture inhibits chronification of the acute pain of knee osteoarthritis: study protocol for a randomized controlled trial                                                                   | no cohort/RCT |
| 203 | H. J. Song, H. J. Seo and D. Kim                                                                                                                                         | 2020 | Effectiveness of high-intensity laser therapy in the management of patients with knee osteoarthritis: A systematic review and meta-analysis of randomized controlled trials                             | no cohort/RCT |
| 204 | D. T. Thomas, R. Shruthi, A. J. Prabhakar, P. V. Dineshbhai and C. Eapen                                                                                                 | 2022 | Hip abductor strengthening in patients diagnosed with knee osteoarthritis – a systematic review and meta-analysis                                                                                       | no cohort/RCT |
| 205 | N. Vogel, R. Kaelin, T. Rychen and M. P. Arnold                                                                                                                          | 2022 | The German version of the High-Activity Arthroplasty Score is valid and reliable for patients after total knee arthroplasty                                                                             | no cohort/RCT |
| 206 | B. Waller, M. Munukka, U. M. Kujala and A. O. Heinonen                                                                                                                   | 2017 | Response to the comments on "Effects of high intensity aquatic resistance training on body composition and walking speed in women with mild knee osteoarthritis: a 4-month RCT with 12-month follow-up" | no cohort/RCT |

|     |                                                                                                                                                                                                          |      |                                                                                                                                                                                      |                             |
|-----|----------------------------------------------------------------------------------------------------------------------------------------------------------------------------------------------------------|------|--------------------------------------------------------------------------------------------------------------------------------------------------------------------------------------|-----------------------------|
| 207 | D. K. White, C. Tudor-Locke, D. T. Pelson, K. D. Gross, J. B. Niu, M. Nevitt, C. E. Lewis, J. Torner and T. Neogi                                                                                        | 2013 | Walking to Meet Physical Activity Guidelines in Knee Osteoarthritis: Is 10,000 Steps Enough?                                                                                         | no cohort/RCT               |
| 208 | M. Wu, L. Luan, A. Pranata, J. Witchalls, R. Adams, J. Bousie and J. Han                                                                                                                                 | 2022 | Is high intensity laser therapy more effective than other physical therapy modalities for treating knee osteoarthritis? A systematic review and network meta-analysis                | no cohort/RCT               |
| 209 | J. Wyszynska and M. Bal-Bocherńska                                                                                                                                                                       | 2018 | Efficacy of High-Intensity Laser Therapy in Treating Knee Osteoarthritis: A First Systematic Review                                                                                  | no cohort/RCT               |
| 210 | A. Zacharias, R. A. Green, A. I. Semciw, M. I. C. Kingsley and T. Pizzari                                                                                                                                | 2014 | Efficacy of rehabilitation programs for improving muscle strength in people with hip or knee osteoarthritis: A systematic review with meta-analysis                                  | no cohort/RCT               |
| 211 | F. Zhang, J. Kumm, F. Svensson, A. Turkiewicz, R. Frobell and M. Englund                                                                                                                                 | 2016 | Risk factors for meniscal body extrusion on MRI in subjects free of radiographic knee osteoarthritis: longitudinal data from the Osteoarthritis Initiative                           | no cohort/RCT               |
| 212 | J. Zhu, W. Chen, Y. Hu, Y. Qu, H. Yang, Y. Zeng, C. Hou, F. Ge, Z. Zhou and H. Song                                                                                                                      | 2022 | Physical activity patterns, genetic susceptibility, and risk of hip/knee osteoarthritis: a prospective cohort study based on the UK Biobank                                          | no cohort/RCT               |
| 213 | J. Casaña, J. Calatayud, Y. Ezzatvar, J. Vinstrup, J. Benítez and L. L. Andersen                                                                                                                         | 2019 | Preoperative high-intensity strength training improves postural control after TKA: randomized-controlled trial                                                                       | other outcome measures      |
| 214 | A. H. de Zwart, J. Dekker, L. D. Roorda, M. van der Esch, P. Lips, N. M. van Schoor, A. C. Heijboer, F. Turkstra, M. Gerritsen, A. Hakkinen, K. Bennell, M. Steultjens, W. F. Lems and M. van der Leeden | 2020 | THE EFFECT OF HIGH-INTENSITY RESISTANCE TRAINING AND VITAMIN D SUPPLEMENTATION ON MUSCLE STRENGTH IN PATIENTS WITH KNEE OSTEOARTHRITIS: A RANDOMIZED CONTROLLED TRIAL                | other outcome measures      |
| 215 | N. E. Jansen, A. Engstrom, C. S. Thudium, A. C. Bay-Jensen, A. H. de Zwart, J. Dekker, W. F. Lems, M. Gerritsen, W. E. van Spil, R. T. Jaspers, F. Turkstra, M. van der Leeden and M. van der Esch       | 2020 | CHANGES IN INFLAMMATION AND MUSCULOSKELETAL TISSUE-DERIVED BIOMARKER SERUM LEVELS IN RESPONSE TO HIGH- AND LOW-INTENSITY RESISTANCE TRAINING IN INDIVIDUALS WITH KNEE OSTEOARTHRITIS | other outcome measures      |
| 216 | M. J. Bade and J. E. Stevens-Lapsley                                                                                                                                                                     | 2011 | Early high-intensity rehabilitation following total knee arthroplasty improves outcomes                                                                                              | unclear exercise principles |
| 217 | M. J. Bade, T. Struessel, M. Dayton, J. Foran, R. H. Kim, T. Miner, P. Wolfe, W. M. Kohrt, D. Dennis and J. E. Stevens-Lapsley                                                                           | 2017 | Early High-Intensity Versus Low-Intensity Rehabilitation After Total Knee Arthroplasty: A Randomized Controlled Trial                                                                | unclear exercise principles |
| 218 | K. R. Baker, M. E. Nelson, D. T. Felson, J. E. Layne, R. Sarno and R. Roubenoff                                                                                                                          | 2001 | The efficacy of home based progressive strength training in older adults with knee osteoarthritis: a randomized controlled trial                                                     | unclear exercise principles |
| 219 | Z. de Jong, M. Munneke, A. H. Zwiderman, H. M. Kroon, A. Jansen, K. H. Runday, D. van Schaardenburg, B. A. C. Dijkmans, C. H. M. Van den Ende, F. C. Breedveld, T. Vlieland and J. M. W. Hazes           | 2003 | Is a long-term high-intensity safe in patients with exercise program effective and rheumatoid arthritis? Results of a randomized controlled trial                                    | unclear exercise principles |
| 220 | J. N. Farr, S. B. Going, P. E. McKnight, S. Kastle, E. C. Cussler and M. Cornett                                                                                                                         | 2010 | Progressive Resistance Training Improves Overall Physical Activity Levels in Patients With Early Osteoarthritis of the Knee: A Randomized Controlled Trial                           | unclear exercise principles |
| 221 | S. Handa, Y. Kamijo, T. Yamazaki, H. Genno and H. Nose                                                                                                                                                   | 2009 | THE EFFECTS OF HIGH-INTENSITY INTERVAL WALKING TRAINING WITH WATER IMMERSION IN MIDDLE-AGED AND OLDER WOMEN WITH LIGHT KNEE OSTEOARTHRITIS                                           | unclear exercise principles |
| 222 | S. Handa, S. Masuki, T. Ohshio, Y. Kamijo, A. Takamata and H. Nose                                                                                                                                       | 2016 | Target intensity and interval walking training in water to enhance physical fitness in middle-aged and older women: a randomised controlled study                                    | unclear exercise principles |
| 223 | K. E. M. Harmelink, R. Dandis, P. J. der Van der Wees Pj, A. Zeegers, M. W. N. der Sanden and J. B. Staal                                                                                                | 2021 | Recovery trajectories over six weeks in patients selected for a high-intensity physiotherapy program after Total knee Arthroplasty: a latent class analysis                          | unclear exercise principles |
| 224 | T. Hashizaki, Y. Nishimura, T. Ogawa, C. Ohno, K. Kouda, Y. Umemoto, T. Taniguchi, H. Yamada and F. Tajima                                                                                               | 2023 | Effectiveness of a 3-Week Rehabilitation Program Combining Muscle Strengthening and Endurance Exercises Prior to Total Knee Arthroplasty: A Non-Randomized Controlled Trial          | unclear exercise principles |
| 225 | P. M. Holm, P. Aagaard, H. Schroder and S. T. Skou                                                                                                                                                       | 2017 | HIGH-INTENSITY STRENGTH TRAINING IN ADDITION TO STANDARD NON-SURGICAL TREATMENT IN PATIENTS WITH KNEE OSTEOARTHRITIS - A RANDOMIZED CONTROLLED TRIAL                                 | unclear exercise principles |

|     |                                                                                                                                            |      |                                                                                                                                                                               |                             |
|-----|--------------------------------------------------------------------------------------------------------------------------------------------|------|-------------------------------------------------------------------------------------------------------------------------------------------------------------------------------|-----------------------------|
| 226 | V. S. Husby, O. A. Foss, O. S. Husby and S. B. Winther                                                                                     | 2018 | Randomized controlled trial of maximal strength training vs. standard rehabilitation following total knee arthroplasty                                                        | unclear exercise principles |
| 227 | B. Karaismailoglu                                                                                                                          | 2021 | High-Intensity Strength Training, Knee Pain, and Knee Joint Compressive Forces in Adults With Knee Osteoarthritis                                                             | unclear exercise principles |
| 228 | S. Y. Lee, J. H. Choi, S. R. Kim, Y. G. Park, H. J. Lee and W. Jeong                                                                       | 2023 | Functional outcomes and length of stay with early and high-intensity rehabilitation after simultaneous bilateral total knee arthroplasty                                      | unclear exercise principles |
| 229 | Z. F. Lin, T. S. Liu, Z. L. Hu, W. T. Que, H. M. Qiu and L. Chen                                                                           | 2022 | Effects of Different Running Intensity on Serum Levels of IL-6 and TNF-alpha in Patients with Early Knee Osteoarthritis                                                       | unclear exercise principles |
| 230 | S. Messier, S. Mihalko, D. Beavers, B. Nicklas, P. DeVita, J. Carr, D. Hunter, K. Bennell, A. Guermazi, M. Lyles and R. Loeser             | 2019 | Is Long-term High-intensity Strength Training Beneficial or Harmful for Knee Osteoarthritis Patients? The Strength Training and Arthritis Trial (START)                       | unclear exercise principles |
| 231 | J. Multanen, T. Rantalainen, H. Kautiainen, R. Ahola, T. Jamsa, M. T. Nieminen, E. Lammentausta, A. Hakkinen, I. Kiviranta and A. Heinonen | 2017 | Effect of progressive high-impact exercise on femoral neck structural strength in postmenopausal women with mild knee osteoarthritis: a 12-month RCT                          | unclear exercise principles |
| 232 | J. Scheer                                                                                                                                  | 2021 | The Effect of high-intensity Strength Training for Knee Pain and Force occurring in the Knee Joint in Adults with Knee Osteoarthritis                                         | unclear exercise principles |
| 233 | D. Vasileiadis, G. Drosos, G. Charitoudis, I. A. Dontas and J. Vlamis                                                                      | 2022 | The Efficacy of High-Intensity Preoperative Physiotherapy Training on Postoperative Outcomes in Greek Patients Undergoing Total Knee Arthroplasty: A Quasi-Experimental Study | unclear exercise principles |
